# Supplementary material for: Human cytomegalovirus antagonizes activation of Fcγ receptors by distinct and synergizing modes of IgG manipulation
Source: eLife. 2021 Mar 16;10:e63877. doi: 10.7554/eLife.63877 (PMC8041466; doi:10.7554/eLife.63877)
Supplement: Figure 1—source data 1. [file elife-63877-fig1-data1.xlsx]

## Sheet: Tabelle1
		34-strep coat IgG		34-strep coat IgA		34MTRP-strep coat IgG		34MTRP-strep coat IgA
	pure (1/1)	0.3361	0.3052	0.1225	0.1063	0.0675	0.0893	0.0801	0.0747
	1/2	0.1862	0.1668	0.1049	0.107	0.0899	0.0841	0.0793	0.0672
	1/4	0.0734	0.0852	0.0838	0.0741	0.0905	0.0806	0.0769	0.0723
	0	0.0699	0.0787	0.0648	0.0766	0.0826	0.0737	0.0661	0.0768
		Exp1	Exp2	Exp1	Exp2	Exp1	Exp2	Exp1	Exp2
		values are averages from technical replicates
