# Supplementary material for: Human cytomegalovirus antagonizes activation of Fcγ receptors by distinct and synergizing modes of IgG manipulation
Source: eLife. 2021 Mar 16;10:e63877. doi: 10.7554/eLife.63877 (PMC8041466; doi:10.7554/eLife.63877)
Supplement: Figure 3—source data 1. [file elife-63877-fig3-data1.xlsx]

## Sheet: Tabelle1
		e.v.	gp68	gp68-CD4	gp34	gp34-CD4	gE/gI	gE-CD4/gI
	Exp1	85.8002	49.9759	79.6381	23.6394	48.1971	54.7357	80.3453
	Exp2	83.4507	55.6274	71.9524	23.3712	73.3333	54.7619	81.4022
		values are geometric mean fluorescence intensities from individual experiments
