# Supplementary material for: Human cytomegalovirus antagonizes activation of Fcγ receptors by distinct and synergizing modes of IgG manipulation
Source: eLife. 2021 Mar 16;10:e63877. doi: 10.7554/eLife.63877 (PMC8041466; doi:10.7554/eLife.63877)
Supplement: Figure 4—figure supplement 1—source data 1. [file elife-63877-fig4-figsupp1-data1.xlsx]

## Sheet: Tabelle1
	CD99	gp68-CD4	gp34-CD4
Exp1	1386	1410	1275
Exp2	1438	1992	1669
Exp3	2004	1659	1289
	values are geometric mean fluorescence intesities
