# Supplementary material for: Human cytomegalovirus antagonizes activation of Fcγ receptors by distinct and synergizing modes of IgG manipulation
Source: eLife. 2021 Mar 16;10:e63877. doi: 10.7554/eLife.63877 (PMC8041466; doi:10.7554/eLife.63877)
Supplement: Figure 4—source data 1. [file elife-63877-fig4-data1.xlsx]

## Sheet: Tabelle1
	gp68-CD4	gp34-CD4
	0.44	0.83
	0.6	0.95
	0.62	0.96
	0.49	0.97
	values are geometric mean fluorescence intensities
	normalized to CD99 control (set to 1)
