# Supplementary material for: Human cytomegalovirus antagonizes activation of Fcγ receptors by distinct and synergizing modes of IgG manipulation
Source: eLife. 2021 Mar 16;10:e63877. doi: 10.7554/eLife.63877 (PMC8041466; doi:10.7554/eLife.63877)
Supplement: Figure 5—source data 1. [file elife-63877-fig5-data1.xlsx]

## Sheet: Tabelle1
	34+68	34	68
Exp1	0.25	1.14557	0.477848
Exp2	0.302139	0.93672	0.344029
Exp3	0.513612	0.984143	0.586584
	values are geometric mean fluorescence intensities (divided by geometric mean fluorescence intensities measured for total antigen)
	normalized to vFcR-deleted mutant within each experiment (set to 1)
	ratios before normalization
	ddd	34+68	34	68
Exp1	0.632	0.158	0.724	0.302
Exp2	1.122	0.339	1.051	0.386
Exp3	7.126	3.66	7.013	4.18
