# Supplementary material for: Human cytomegalovirus antagonizes activation of Fcγ receptors by distinct and synergizing modes of IgG manipulation
Source: eLife. 2021 Mar 16;10:e63877. doi: 10.7554/eLife.63877 (PMC8041466; doi:10.7554/eLife.63877)
Supplement: Figure 6—source data 1. [file elife-63877-fig6-data1.xlsx]

## Sheet: Tabelle1
	gp68	gp68+Ifx	gp34	gp34+Ifx	gp34+gp68	gp34+gp68+Ifx
Exp1	0.642143	1.21383	0.67632	1.17467	0.370246	0.783018
Exp2	0.541135	1.01778	0.386964	1.02043	0.591082	0.788362
Exp3	0.749708	1.27528	0.386742	1.27178	0.364741	0.79332
	values are averages from technical replicates
	normalized to CD99 control (set to1)
