# Supplementary material for: Human cytomegalovirus antagonizes activation of Fcγ receptors by distinct and synergizing modes of IgG manipulation
Source: eLife. 2021 Mar 16;10:e63877. doi: 10.7554/eLife.63877 (PMC8041466; doi:10.7554/eLife.63877)
Supplement: Figure 6—source data 2. [file elife-63877-fig6-data2.xlsx]

## Sheet: Tabelle1
	FcR6 34+68	FcR8 68	FcR12 34	FcR13 ddd
Exp1	0.8497	1.306	1.473	2.236
Exp2	1.141	1.647	1.646	1.877
	values are averages from technical replicates
