# Supplementary material for: Human cytomegalovirus antagonizes activation of Fcγ receptors by distinct and synergizing modes of IgG manipulation
Source: eLife. 2021 Mar 16;10:e63877. doi: 10.7554/eLife.63877 (PMC8041466; doi:10.7554/eLife.63877)
Supplement: Figure 6—source data 3. [file elife-63877-fig6-data3.xlsx]

## Sheet: Tabelle1
	gp34+sgp34MTRP	gp34+sgp68
Exp1	0.718376	0.311418
Exp2	0.643687	0.204801
Exp3	0.421747	0.205659
	values are averages from technical replicates
	normalized to CD99 control (set to1)
