# Supplementary material for: Human cytomegalovirus antagonizes activation of Fcγ receptors by distinct and synergizing modes of IgG manipulation
Source: eLife journal article supplement (doi:10.7554/elife.63877), 2021-03-16
Supplement: supp [file elife_poa_e63877_Figure_3_figure_supplement_1.pdf › elife_poa_e63877_Figure_3_figure_supplement_1.pdf]

# Figure 3-figure supplement 1

|              | Transmembrane Domain                              | Cytosolic Domain                                                                                                                         |
|--------------|---------------------------------------------------|------------------------------------------------------------------------------------------------------------------------------------------|
| HCMV gB      | [ <b>Ectodomain</b> ]-FGAFTIILVAIAVVIITYLIY       | TRQRRRLCTQPLQNLFPYLVSADGTTVTSGSTKDTSLQAPPSYEESVYNNGRKGPGPPSSDASTAAPPYTNEQAYQMLLALARLDAEQRAQQNGTDSLGGQTGTQDKGQKPNLLDRLRHRKNGYRHLKDSDEEENV |
| HCMV gp34    | [ <b>Ectodomain</b> ]-GLSLHCAWVSGMMIFVGALVICF     | LRSQRIGEQDAEHLRTDLDETEPLLLTVDGDLDQ                                                                                                       |
| HCMV gp68    | [ <b>Ectodomain</b> ]-LAYGVLAFLVFMVILLVVTYML      | ARRRDWSYKRLEEPVEEKKHPVPYFKQW                                                                                                             |
| HCMV gp95    | [ <b>Ectodomain</b> ]-TVWTIVLVCMACIVLFFA          | RRAFNNKKYHMLQDTVSESEFIVRYHTEHED                                                                                                          |
| HCMV gpRL13  | [ <b>Ectodomain</b> ]-IPLGIHAVWAGIVVSVALIAL       | YMGNNRRRPRKPRYTRLPKYDPDESWTKT                                                                                                            |
| RhCMV gpRh05 | [ <b>Ectodomain</b> ]-WMVHISFATMALACFGVAVVLSGCVCL | RSVRAWTQKYRPLNEDPAPQKIDFPDGTMKHEPHVTVIEPTKSADGTVVGLSAVSDDKPATLWLSR                                                                       |
| MCMV m138    | [ <b>Ectodomain</b> ]-LAAVACFFLAAILVLVHISFWIS     | SPPCNLPGCVRHT                                                                                                                            |
| HSV-1 gE     | [ <b>Ectodomain</b> ]-LGAVMGAALLLSALGLSVWAC       | MTCWRRRAWRAVKSRASGKGPTYIRVADSELYADWSSDSEGERDQVPWLAPPERPDSPSTNGSGFEILSPTAPSVYPRSDGHQSRRQLTTFGSGRPDRRYSQASDSSVFW                           |
