# Supplementary figures and images for: Human cytomegalovirus antagonizes activation of Fcγ receptors by distinct and synergizing modes of IgG manipulation
Source: eLife journal article supplement (doi:10.7554/elife.63877), 2021-03-16

Figure 1-figure supplement 1

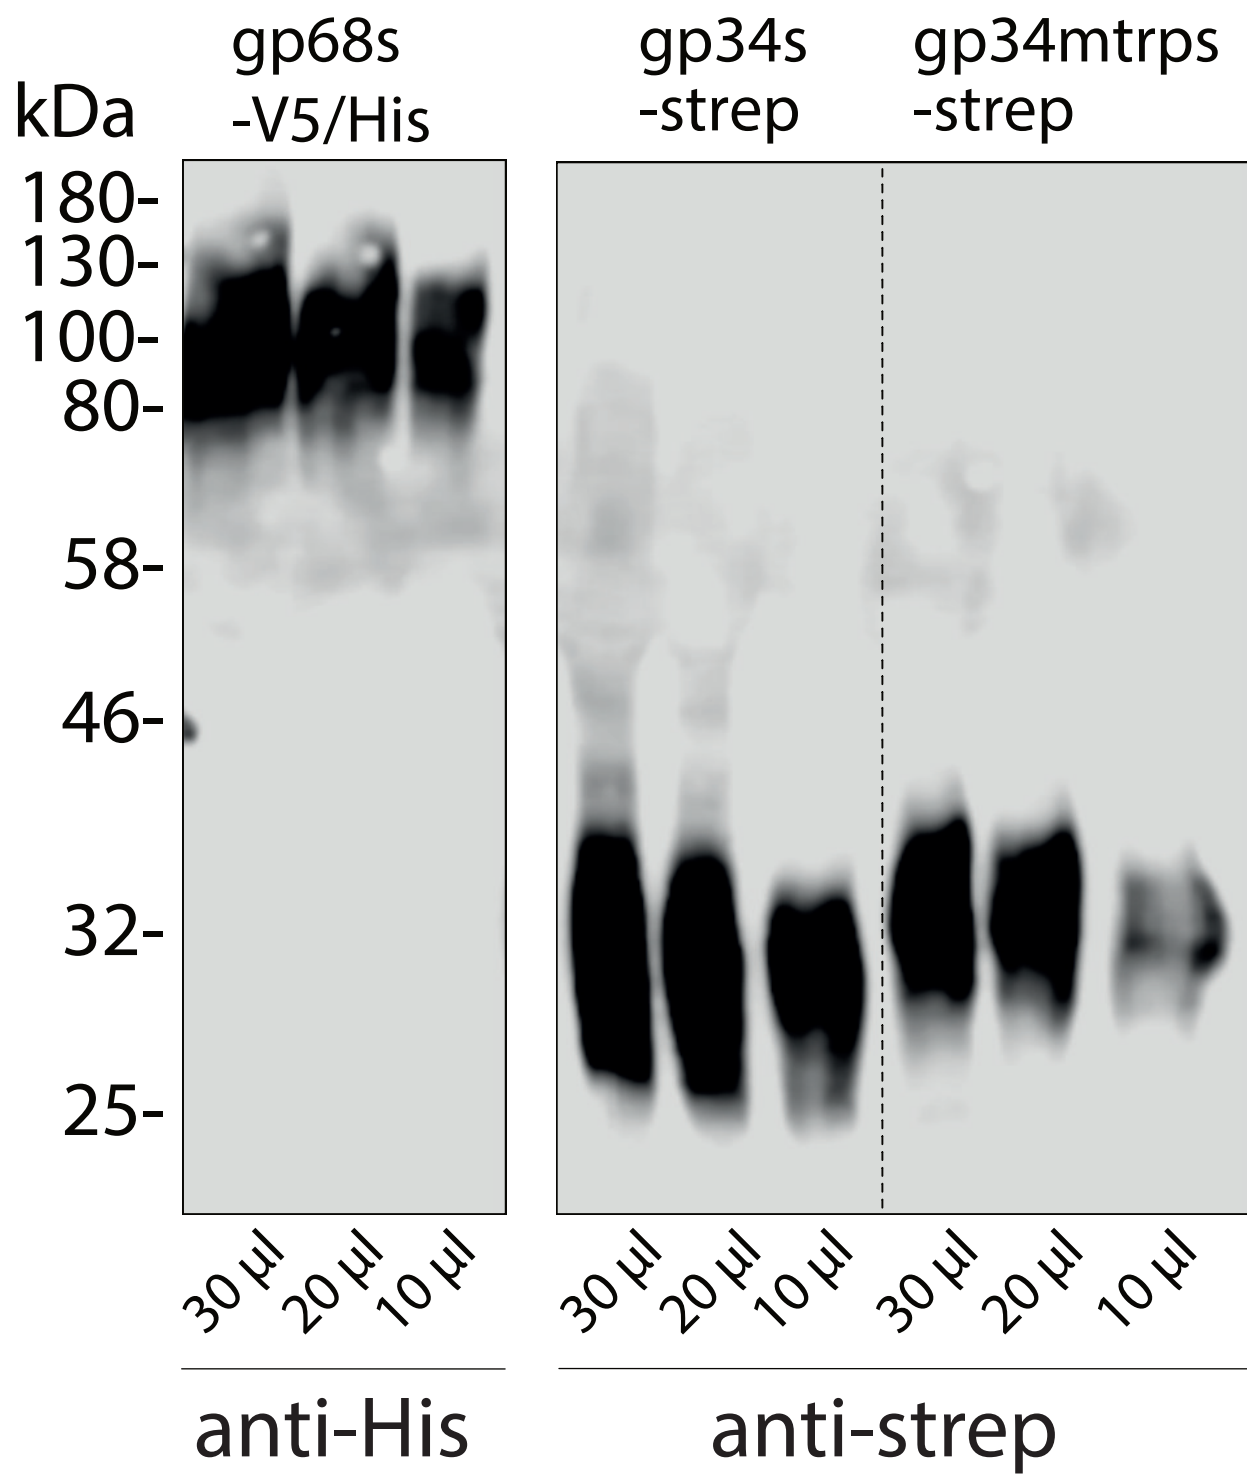

Supplement: supp [file elife_poa_e63877_Figure_1_figure_supplement_1.pdf › elife_poa_e63877_Figure_1_figure_supplement_1.pdf]

Figure 1-figure supplement 2

**A** sgp34 protein domain structure

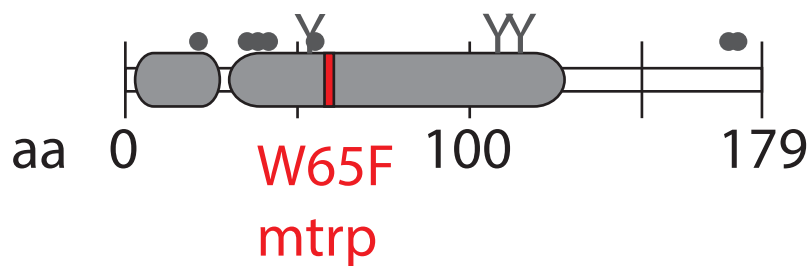

**B** sgp34 -V5/His sgp34mtrp -V5/His

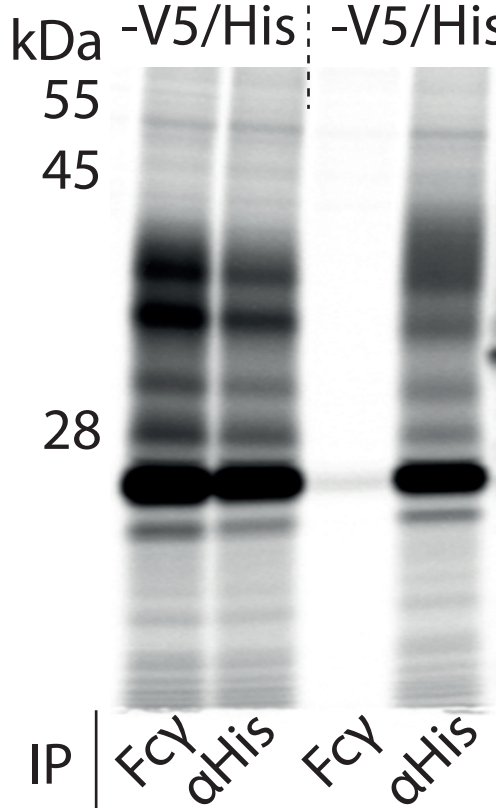

**C**

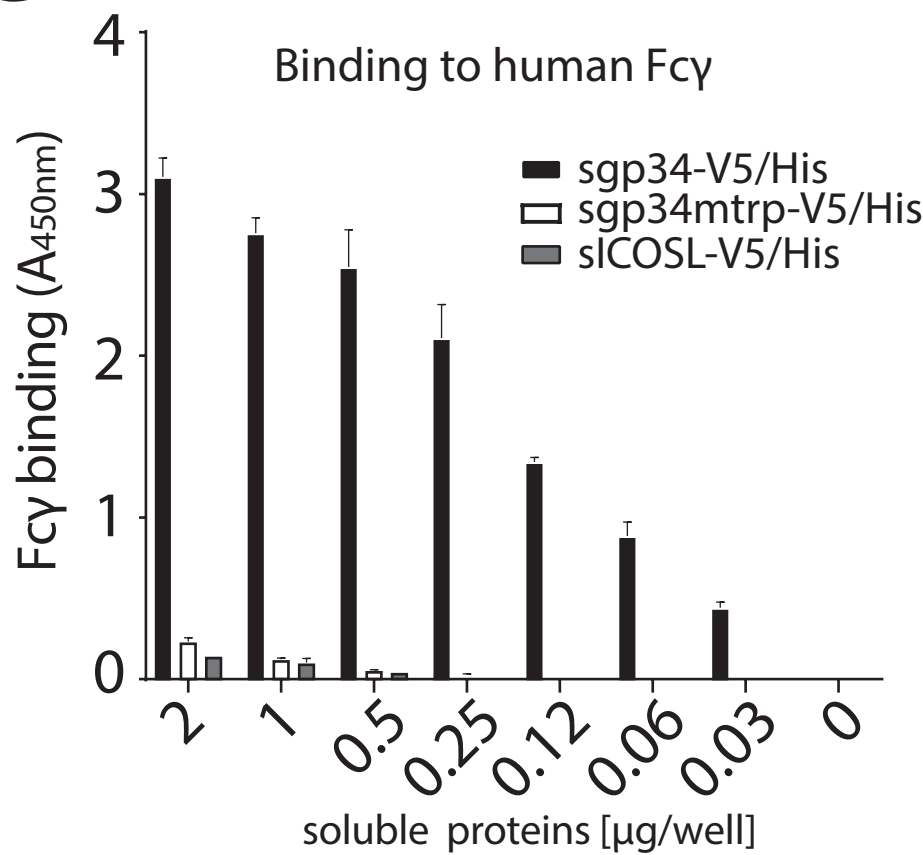

Supplement: supp [file elife_poa_e63877_Figure_1_figure_supplement_2.pdf › elife_poa_e63877_Figure_1_figure_supplement_2.pdf]

Figure 2-figure supplement 1

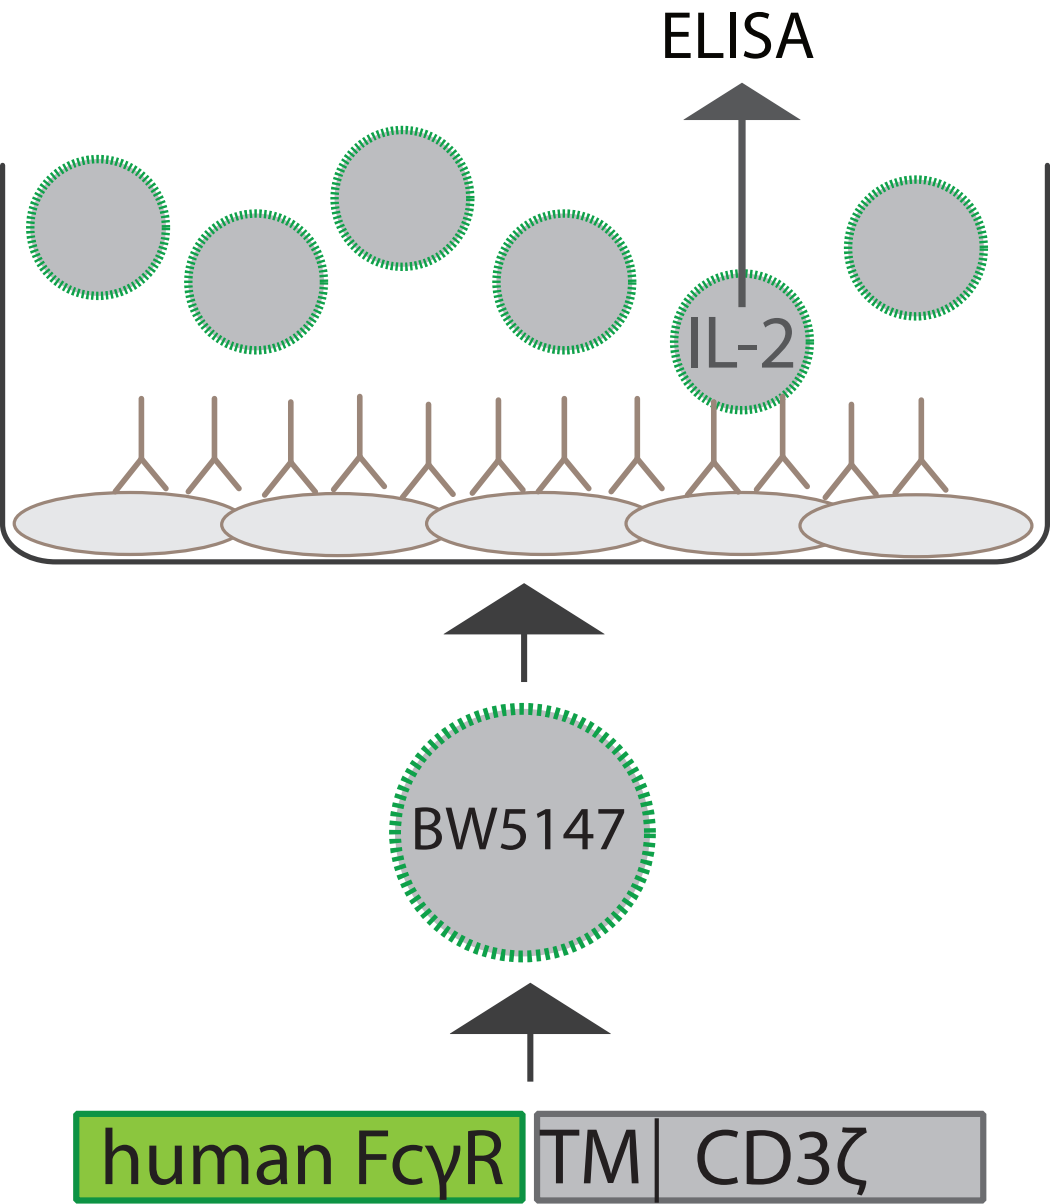

Supplement: supp [file elife_poa_e63877_Figure_2_figure_supplement_1.pdf › elife_poa_e63877_Figure_2_figure_supplement_1.pdf]

Figure 3-figure supplement 2

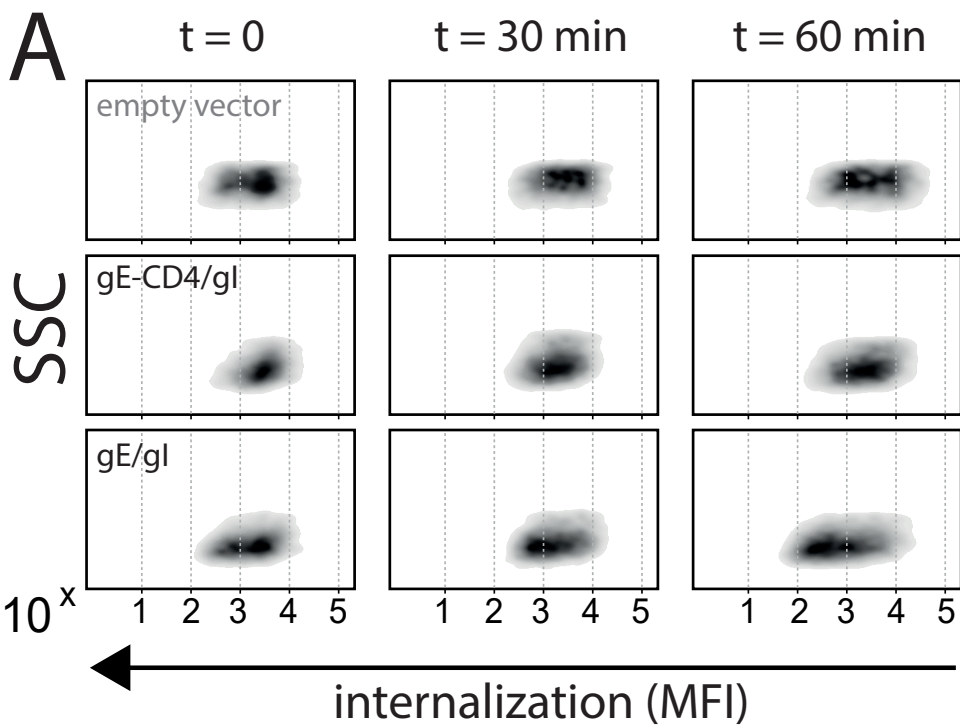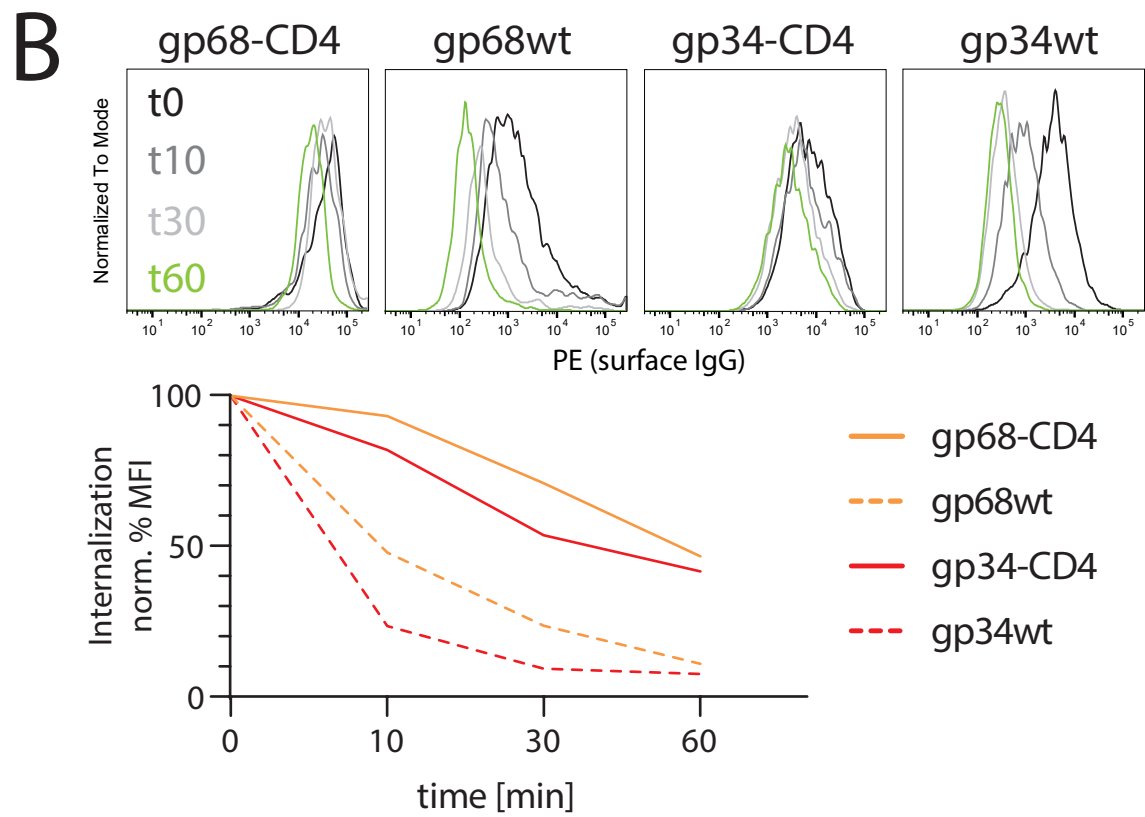

Supplement: supp [file elife_poa_e63877_Figure_3_figure_supplement_2.pdf › elife_poa_e63877_Figure_3_figure_supplement_2.pdf]

# Figure 4-figure supplement 1

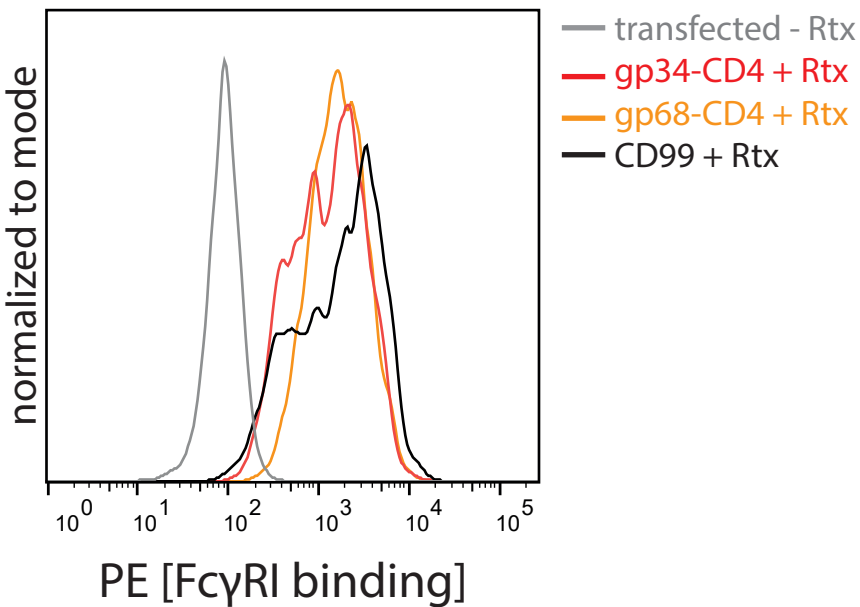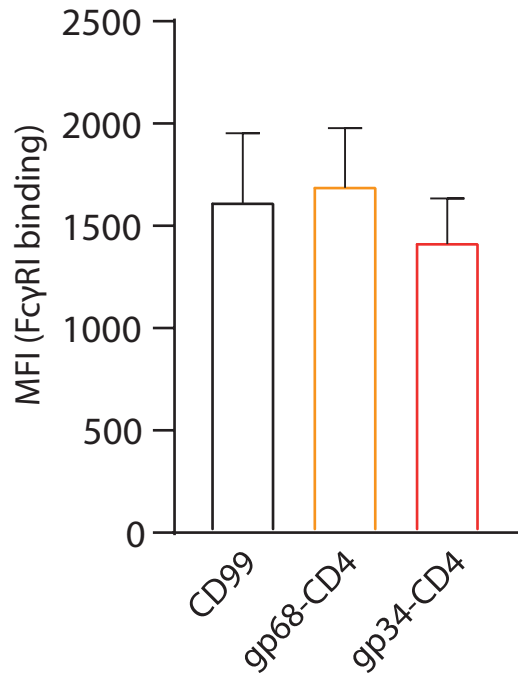

Supplement: supp [file elife_poa_e63877_Figure_4_figure_supplement_1.pdf › elife_poa_e63877_Figure_4_figure_supplement_1.pdf]

Figure 5-figure supplement 1

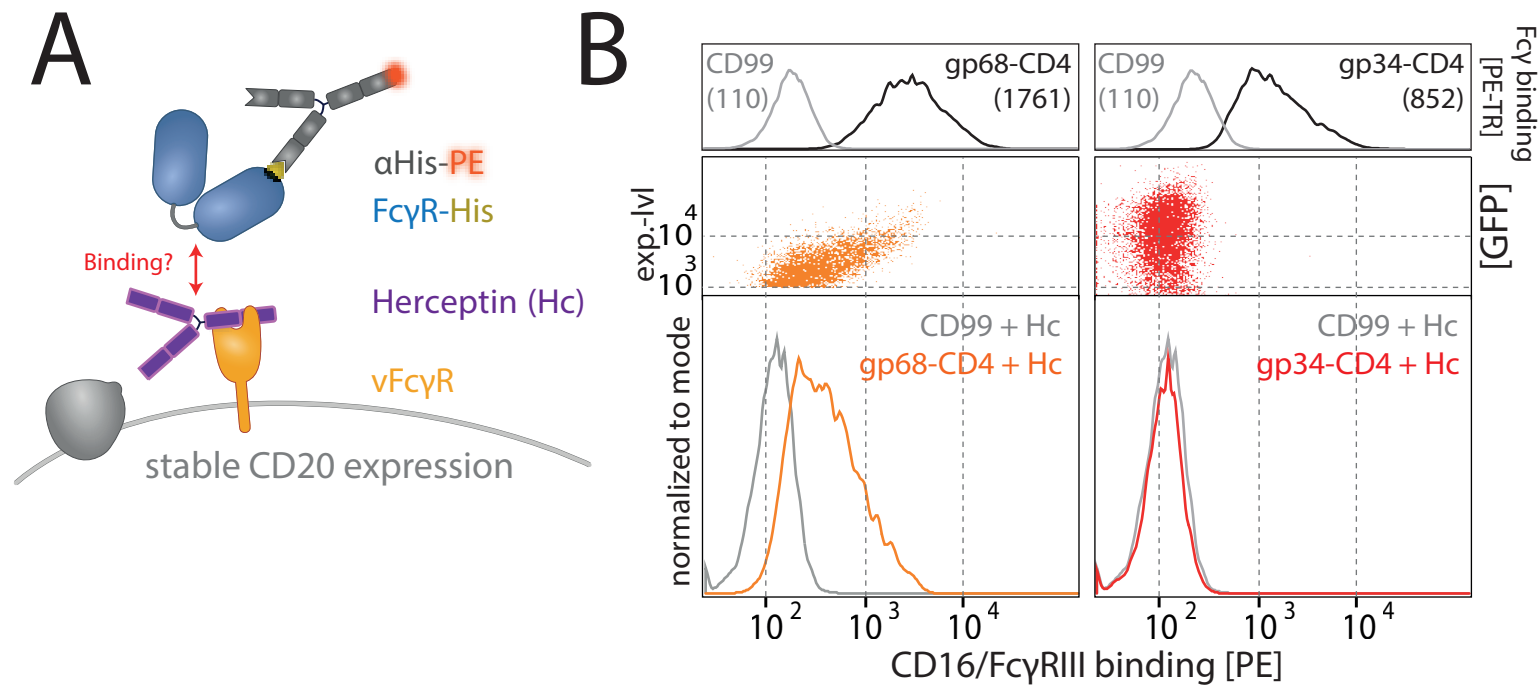

Supplement: supp [file elife_poa_e63877_Figure_5_figure_supplement_1.pdf › elife_poa_e63877_Figure_5_figure_supplement_1.pdf]

Figure 5-figure supplement 2

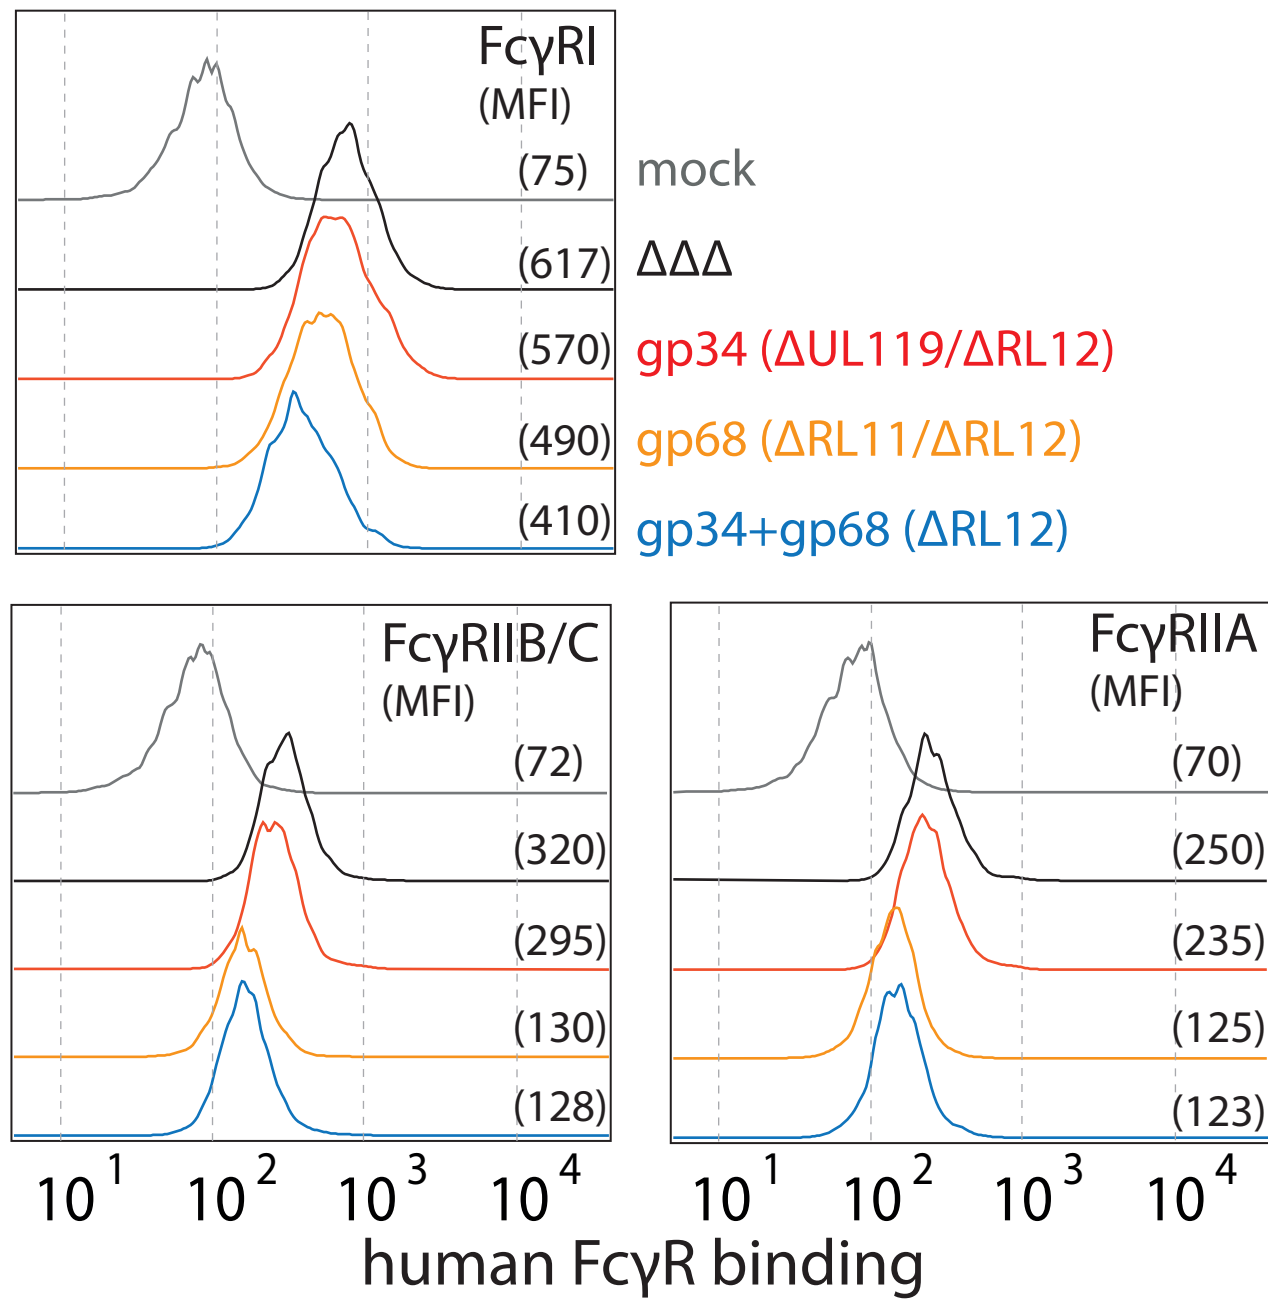

Supplement: supp [file elife_poa_e63877_Figure_5_figure_supplement_2.pdf › elife_poa_e63877_Figure_5_figure_supplement_2.pdf]

# Figure 6-figure supplement 1

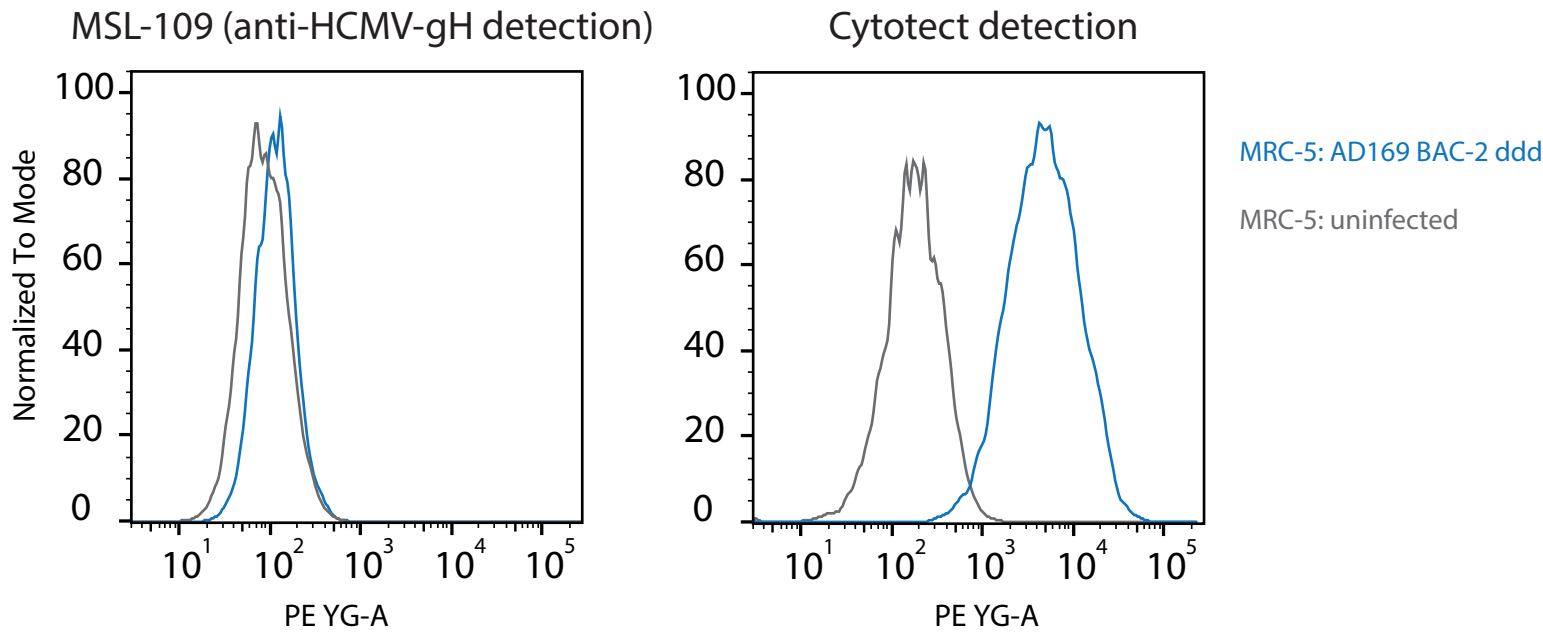

Supplement: supp [file elife_poa_e63877_Figure_6_figure_supplement_1.pdf › elife_poa_e63877_Figure_6_figure_supplement_1.pdf]
